# Supplementary material
Source: publisher figshare collection journal article supplement (https://acs.figshare.com/ndownloader/files/3856888)
Supplement: Supplementary file 1 [file 3856888]

# Tuning Interfacial Electron Transfer in Nanostructured Cuprous Oxide Photoelectrochemical Cells with Charge-Selective Molecular Coatings

Keith M. Haynes, Kaci C. Kratch, Sean D. Stovall, Christopher O. Obondi, Casey R. Thurber, W. Justin

Youngblood\*

Department of Chemistry, University of North Texas, Denton, Texas, 76203.

youngblood@unt.edu

## Supporting Information (14 pp.)

| <b><u>Table of Contents</u></b>                                                                    | <b><u>Page(s)</u></b> |
|----------------------------------------------------------------------------------------------------|-----------------------|
| Experimental Section                                                                               | 2                     |
| Figures S1/S2: Device data for adamantane-sensitized Cu <sub>2</sub> O films                       | 3                     |
| Figure S3: Device data for PTCDA-sensitized Cu <sub>2</sub> O films                                | 4                     |
| Table S1: Device data for all devices                                                              | 4                     |
| Figures S4/S5: SEM images of <b>ZnP-A</b> film before/after soaking 24 h                           | 5                     |
| Figures S6/S7: SEM images of <b>C60M-A</b> film before/after soaking 24 h                          | 6                     |
| Figures S8/S9: SEM images of C343 film before/after soaking 24 h                                   | 7                     |
| Figures S10/S11: SEM images of <b>NcQ-A</b> film before/after soaking 24 h                         | 8                     |
| Figures S12/S13: SEM images of PTCDA film before/after soaking 24 h                                | 9                     |
| Figures S14/S15: SEM images of N3 film before/after soaking 24 h                                   | 10                    |
| Figures S16/S17: SEM images of N3 film after soaking 6 h                                           | 11                    |
| Figures S18/S19: SEM images of 1-adamantanecarboxylic acid before/after soaking 24 h               | 12                    |
| Figures S20/S21: Cyclic and Differential Pulse Voltammetry data for C343 (vs. Fc/Fc <sup>+</sup> ) | 13                    |
| References                                                                                         | 14                    |

## Experimental Section:

*Sensitizers.* The syntheses of **NcQ-A**, **C60M-A**, and **ZnP-A** have been reported elsewhere.<sup>1-4</sup> C343 and 1-adamantanecarboxylic acid were obtained commercially (Aldrich), as was the N3 dye (Solaronix) and all were used as received.

*Preparation of Cu<sub>2</sub>O Nanorod arrays.* Cu<sub>2</sub>O nanorod films were prepared as previously described,<sup>5</sup> with changes that included passivation of bare F-SnO<sub>2</sub> areas of the conductive glass substrate, as well as slightly elevated temperature and pH for Cu<sub>2</sub>O deposition. The elevation of pH and temperature was observed to improve the reproducibility of Cu<sub>2</sub>O nanorod growth. ZnO nanorods that were hydrothermally grown on F-SnO<sub>2</sub>/glass substrates pre-seeded with MnOOH nanoparticles in an aqueous bath of ZnSO<sub>4</sub>, ethanolamine and NH<sub>4</sub>OH at 90°C were then subjected to anodic passivation of bare F-SnO<sub>2</sub> via graft polymerization of poly(phenylene oxide).<sup>6,7</sup> Retail fingernail polish, diluted to 15% solution (v/v) in 1,2-dichloroethane/acetone (1:1) was spincoated over the ZnO nanorod films at 2000 rpm for 2 min. Fingernail polish is typically 13-22 wt% nitrocellulose, so the final nitrocellulose solution for spin-casting is estimated at 1-2 wt% nitrocellulose. Polymer-coated slides were then immersed in an aqueous solution of phosphoric acid (0.5 M) or boric acid (0.5 M) and left for 5 min or overnight, respectively. Nanopore membrane-coated substrates were subjected to electrodeposition using the F-SnO<sub>2</sub>/glass substrate as a working electrode, and fitting a glass joint with an o-ring over the substrate with a clamp to make a seal. The glass vessel was filled with an aqueous solution containing lactic acid and CuSO<sub>4</sub>, adjusted to pH 10 with 1 M NaOH (aq). A platinum counterelectrode and Ag/AgCl quasi reference electrode were each fitted into the vessel and wired through a septum used to seal the vessel. The electrolyte was purged with argon through the septum. The vessel was immersed in a water bath at 40°C and electrodeposition was performed cathodically at constant potential (400–600 mV).<sup>8</sup>

*Sensitization of the Cu<sub>2</sub>O films.* Sensitizers were dissolved in anhydrous CH<sub>3</sub>CN (N3, C343) or anhydrous DMF (**C60M-A**, **ZnP-A**, **NcQ-A**) to 1-3 mM concentration, and allowed to soak for 24 h. SEM images were collected before and after soaking (*vide infra*). Upon observation of etching by the N3 dye, an additional film was soaked for just 6 h to assess the etching at shorter time.

*Preparation and testing of photoelectrochemical cells.* Cells were assembled by melt-adhesion of a thin film of Surlyn® polymer between the Cu<sub>2</sub>O/F-SnO<sub>2</sub> electrode and a platinized F-SnO<sub>2</sub> counterelectrode.<sup>9</sup> The cells were filled by capillary action with an electrolyte composed of 0.1 M LiClO<sub>4</sub>, 50 mM methyl viologen tetrafluoroborate, and 25 mM decamethylcobaltocene. After filling the cells with electrolyte, the entry/exit ports were sealed with Hysol 1C epoxy. Current-voltage measurements were done with a Keithley 2400 sourcemeter and solar simulator (SolarLight, Inc.). IPCE spectra were measured against a calibrated silicon photodiode using monochromatic light from a Xenon lamp (PV Measurements QEX7).

## Adamantane-sensitized Cu<sub>2</sub>O

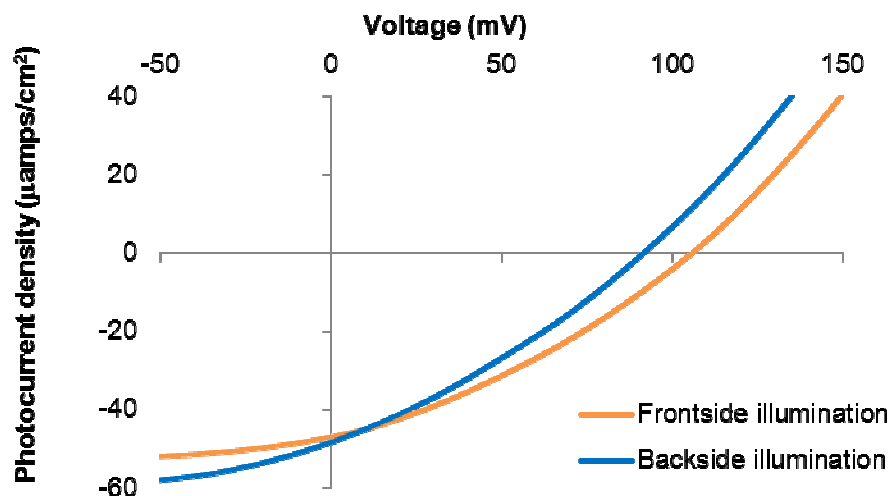

Figure S1. Current-voltage behavior of a photoelectrochemical cell wherein the Cu<sub>2</sub>O nanorod film was sensitized with 1-adamantanecarboxylic acid (from EtOH soln, for 24 h) prior to cell assembly. The decreased photocurrent relative to bare Cu<sub>2</sub>O nanorods suggest that forward electron transport to the methyl viologen has been inhibited by the adamantyl sensitization.

## Adamantane-sensitized Cu<sub>2</sub>O

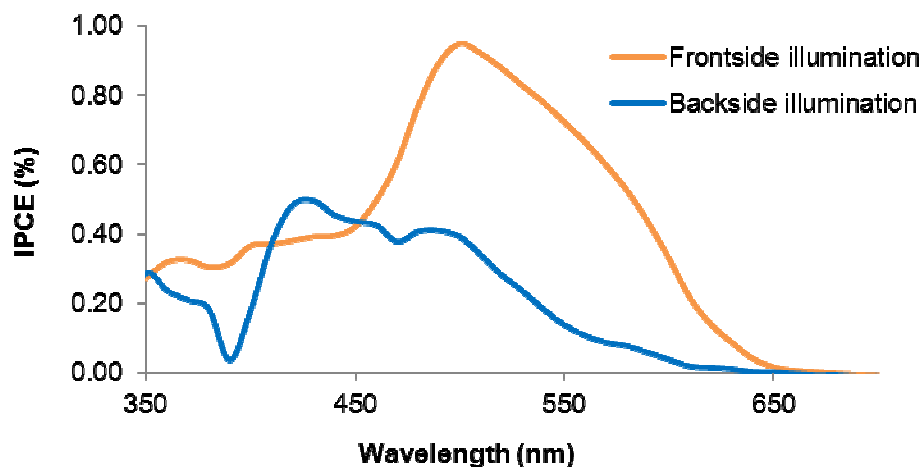

Figure S2. External quantum efficiency behavior of a photoelectrochemical cell wherein the Cu<sub>2</sub>O nanorod film was sensitized with 1-adamantanecarboxylic acid (from EtOH soln, for 24 h) prior to cell assembly.

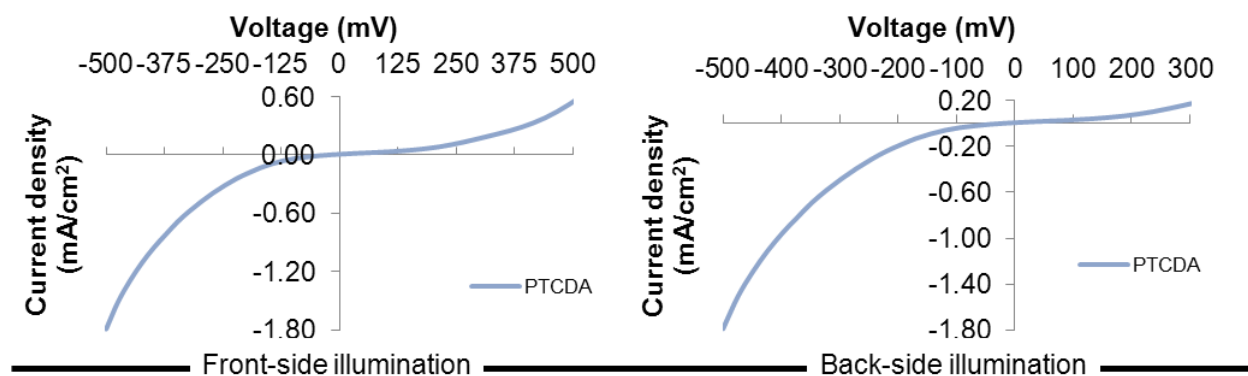

Figure S3. Device data for PTCDA-coated cuprous oxide nanorods (full voltage range).

Table S1. Device Performance Metrics for Photoelectrochemical Cells using Bare and Molecule-Coated  $\text{Cu}_2\text{O}$  Nanorod films.

| Surface coating                              | Illumination | Active area ( $\text{cm}^2$ ) | $J_{\text{SC}}$ ( $\mu\text{Amp}/\text{cm}^2$ ) | $V_{\text{OC}}$ (mV) | FF   | $\eta$ (%)           |
|----------------------------------------------|--------------|-------------------------------|-------------------------------------------------|----------------------|------|----------------------|
| <b>ZnP-A</b>                                 | Front        | 0.60                          | 1760                                            | 197                  | 0.28 | 0.096                |
| <b>ZnP-A</b>                                 | Back         | 0.60                          | 836                                             | 183                  | 0.28 | 0.043                |
| <b>C60M-A</b>                                | Front        | 0.52                          | 1480                                            | 175                  | 0.29 | 0.076                |
| <b>C60M-A</b>                                | Back         | 0.52                          | 575                                             | 140                  | 0.30 | 0.024                |
| <b>NcQ-A</b>                                 | Front        | 0.53                          | 688                                             | 140                  | 0.24 | 0.023                |
| <b>NcQ-A</b>                                 | Back         | 0.53                          | 299                                             | 103                  | 0.26 | $7.9 \times 10^{-3}$ |
| <b>C343</b>                                  | Front        | 0.42                          | 717                                             | 102                  | 0.27 | 0.020                |
| <b>C343</b>                                  | Back         | 0.42                          | 271                                             | 102                  | 0.27 | $7.4 \times 10^{-3}$ |
| <b>bare <math>\text{Cu}_2\text{O}</math></b> | Front        | 0.60                          | 207                                             | 81                   | 0.27 | $4.6 \times 10^{-3}$ |
| <b>bare <math>\text{Cu}_2\text{O}</math></b> | Back         | 0.60                          | 140                                             | 90                   | 0.28 | $3.5 \times 10^{-3}$ |
| <b>N3</b>                                    | Front        | 0.63                          | 56                                              | 124                  | 0.22 | $1.5 \times 10^{-3}$ |
| <b>N3</b>                                    | Back         | 0.63                          | 32                                              | 94                   | 0.26 | $7.7 \times 10^{-4}$ |
| <b>Adamantane-A</b>                          | Front        | 0.61                          | 47                                              | 104                  | 0.33 | $1.6 \times 10^{-3}$ |
| <b>Adamantane-A</b>                          | Back         | 0.61                          | 48                                              | 92                   | 0.29 | $1.3 \times 10^{-3}$ |
| <b>PTCDA</b>                                 | Front        | 0.46                          | -32*                                            | -27*                 | n/a  | n/a                  |
| <b>PTCDA</b>                                 | Back         | 0.46                          | 10                                              | 5                    | 0.26 | $1.3 \times 10^{-5}$ |

Front side illumination (through  $\text{Cu}_2\text{O}$ ) is shown in shaded rows. Surface coatings (and bare  $\text{Cu}_2\text{O}$ ) are vertically arranged in descending order of highest to lowest overall efficiency across each given illumination direction. Adamantane-A = adamantane-1-carboxylic acid. \*Device photocurrent broke down before reaching short-circuit conditions.

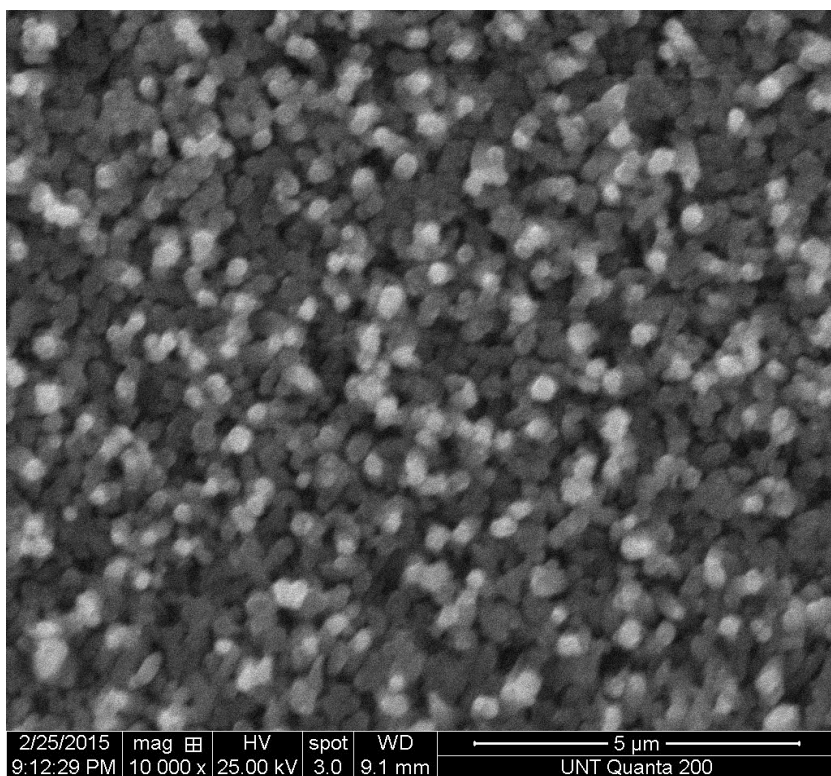

Figure S4. SEM image of Cu<sub>2</sub>O nanorod film before sensitization with **ZnP-A**.

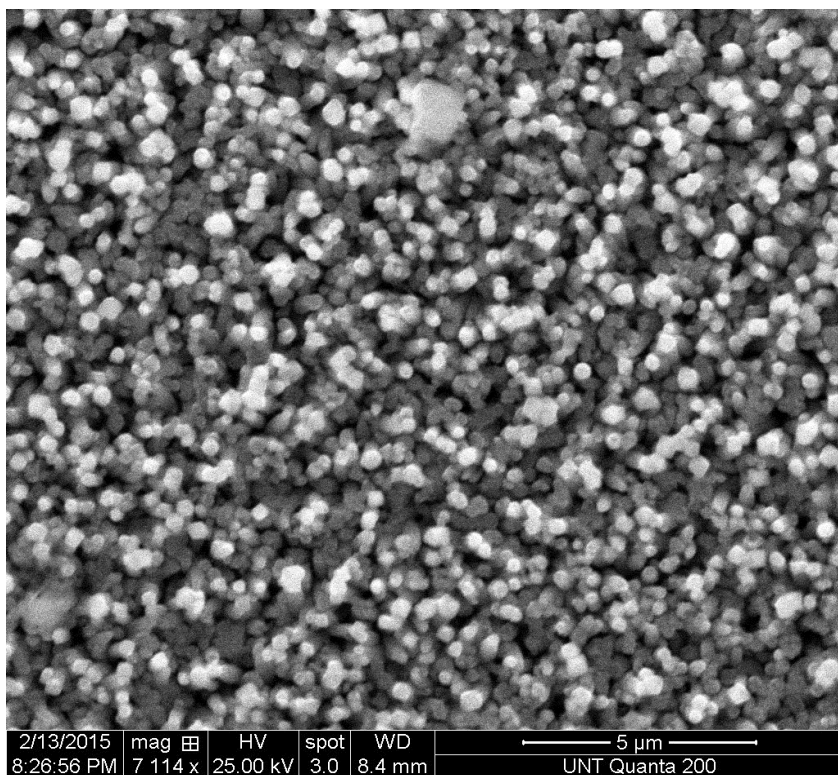

Figure S5. SEM image of Cu<sub>2</sub>O nanorod film after 24 h sensitization with **ZnP-A**.

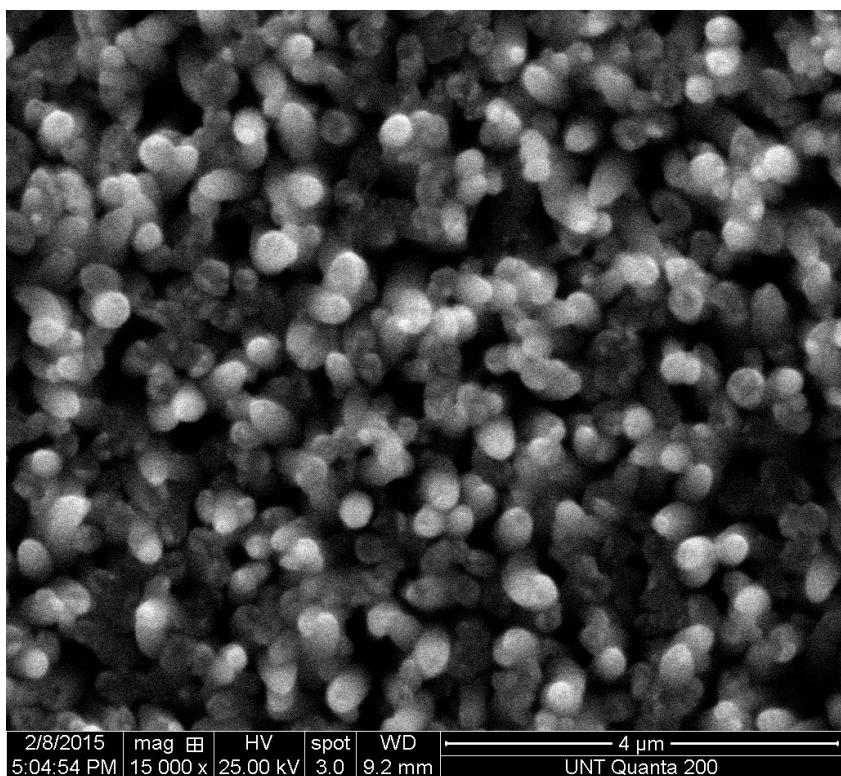

Figure S6. SEM image of Cu<sub>2</sub>O nanorod film before sensitization with **C60M-A**.

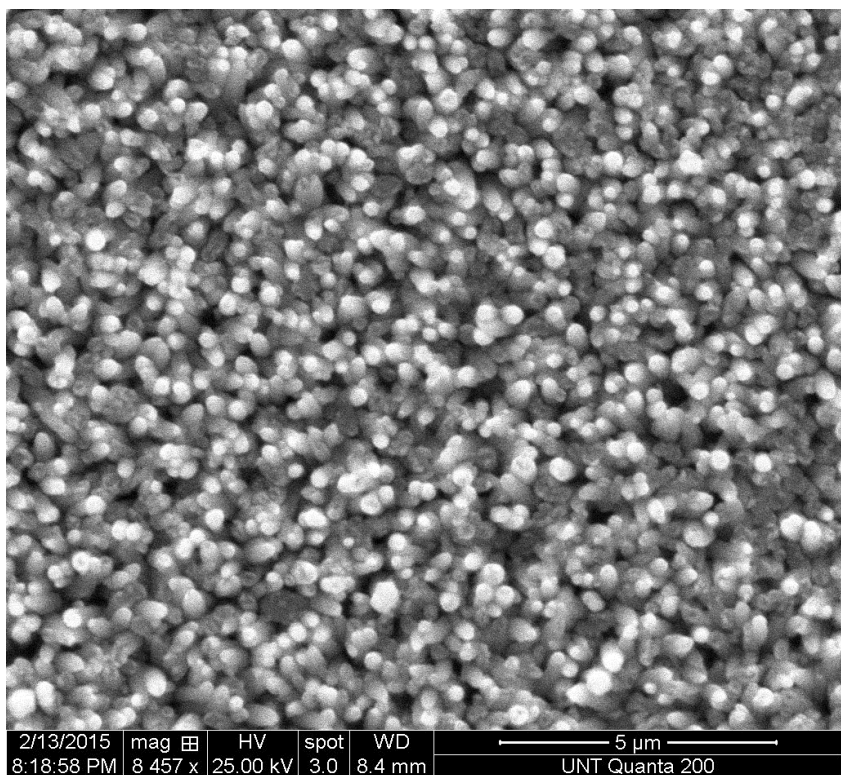

Figure S7. SEM image of Cu<sub>2</sub>O nanorod film after 24 h sensitization with **C60M-A**.

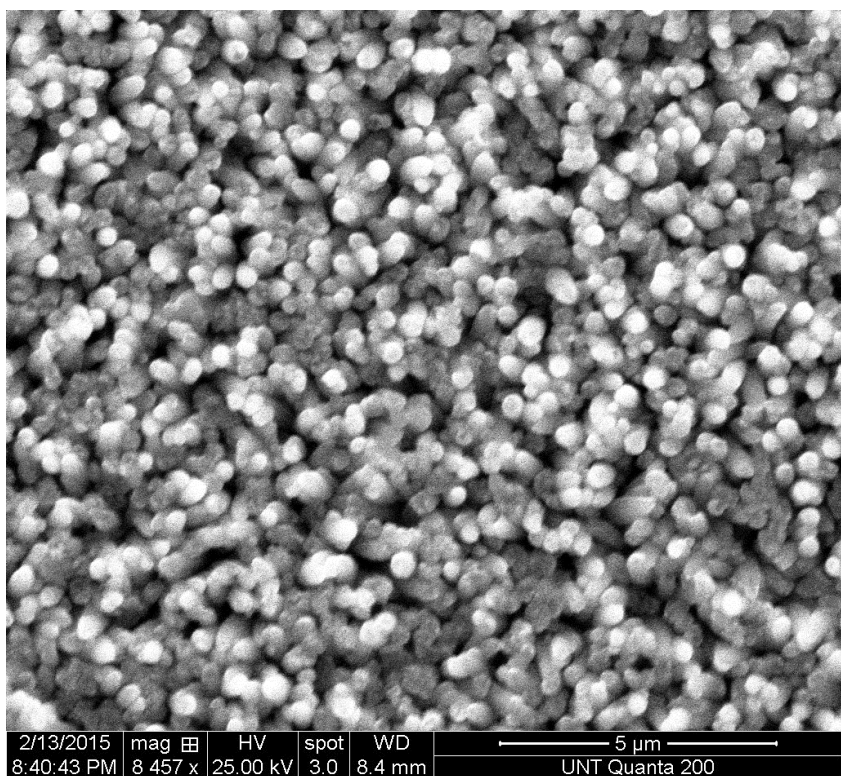

Figure S8. SEM image of Cu<sub>2</sub>O nanorod film before sensitization with C343.

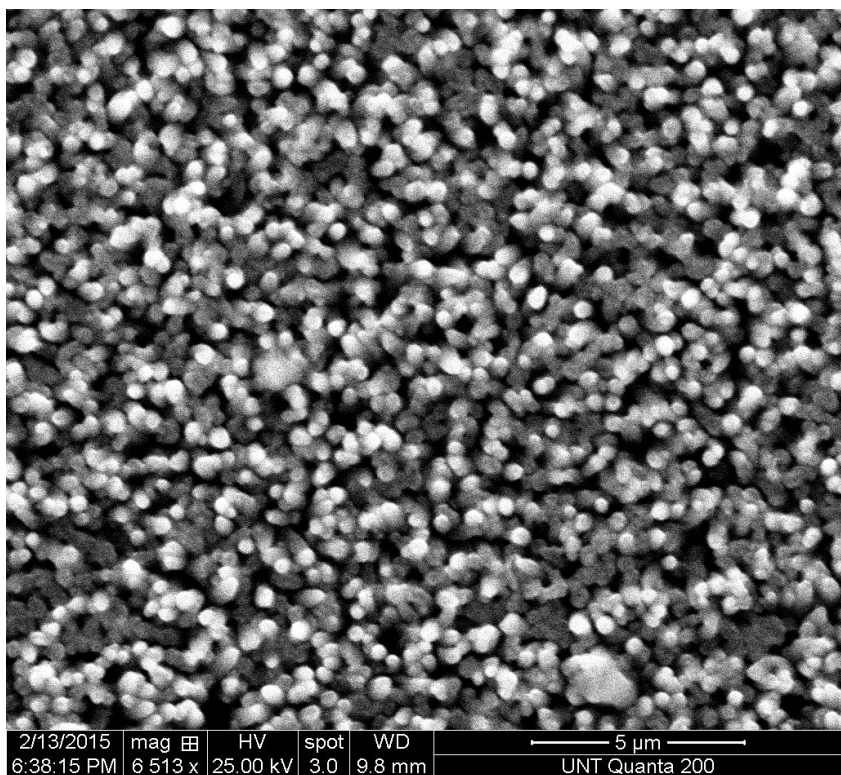

Figure S9. SEM image of Cu<sub>2</sub>O nanorod film after 24 h sensitization with C343.



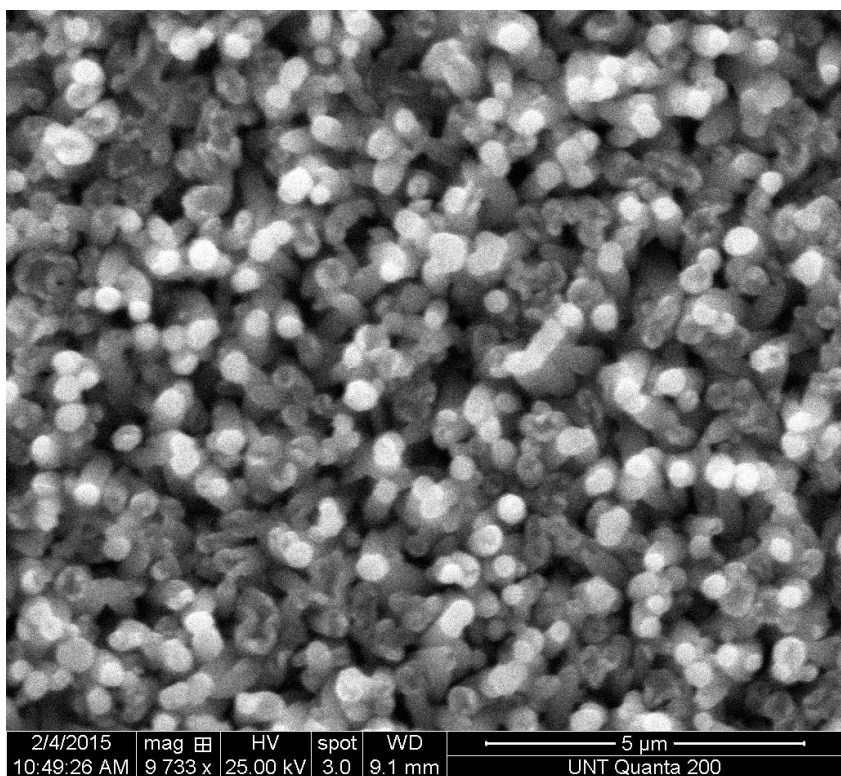

Figure S10. SEM image of Cu<sub>2</sub>O nanorod film before sensitization with **NcQ-A**.

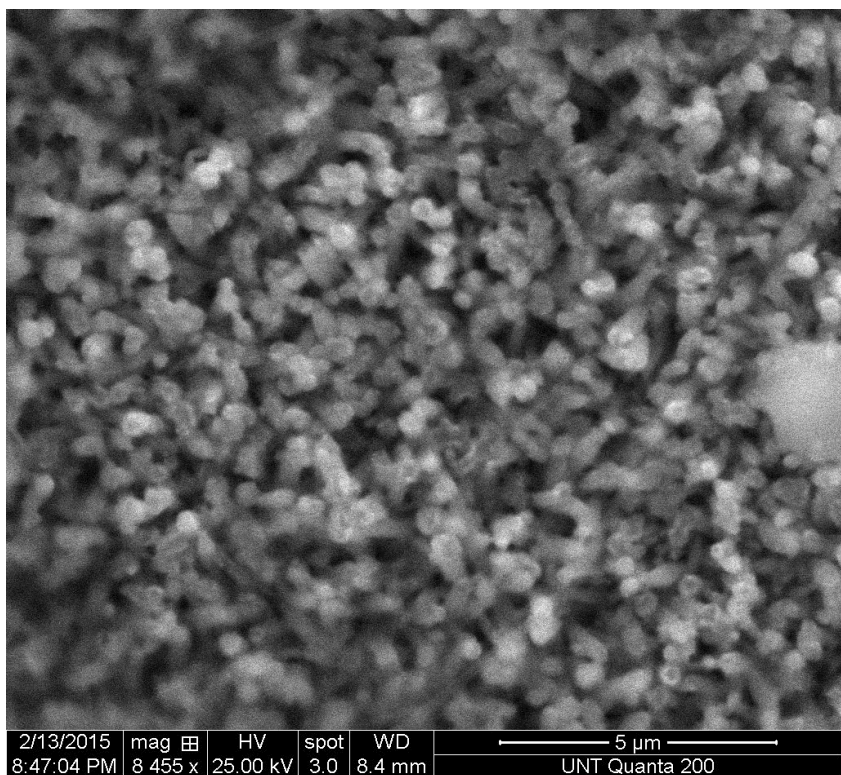

Figure S11. SEM image of Cu<sub>2</sub>O nanorod film after 24 h sensitization with **NcQ-A**.



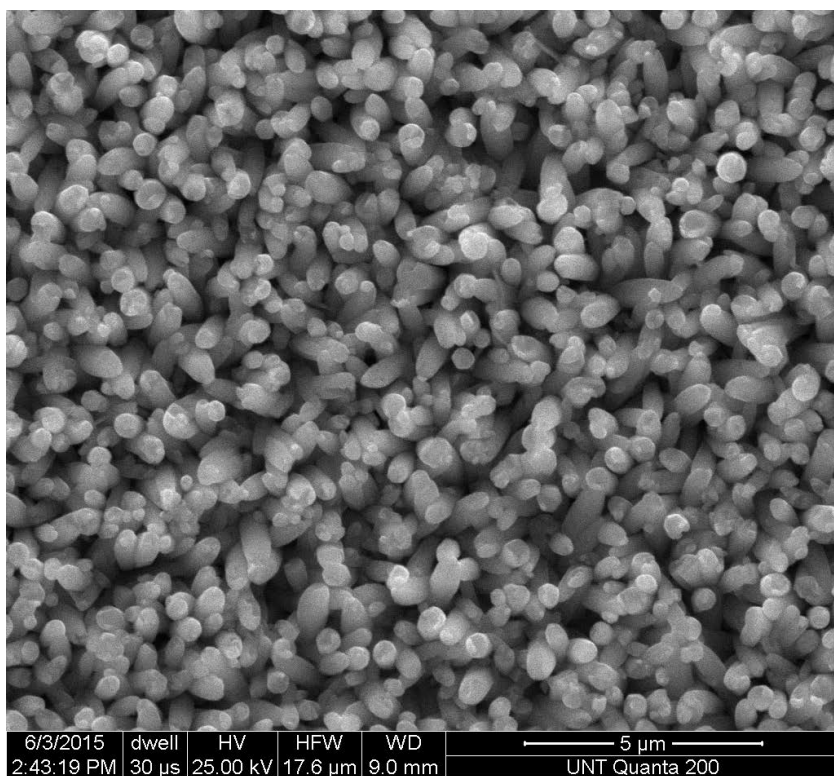

Figure S12. SEM image of Cu<sub>2</sub>O nanorod film before sensitization with N3.

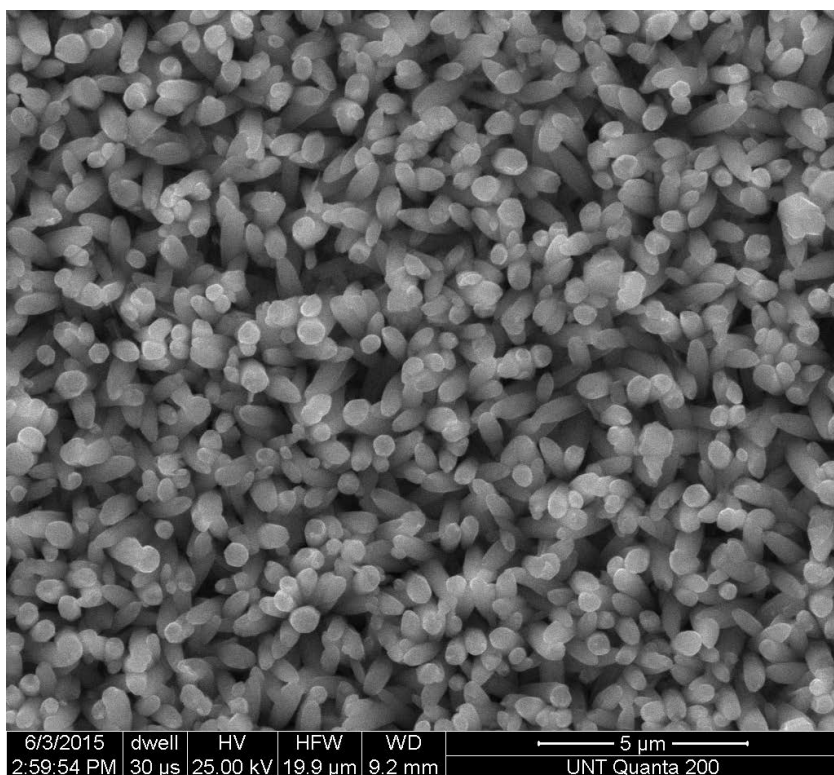

Figure S13. SEM image of Cu<sub>2</sub>O nanorod film after sensitization with PTCDA

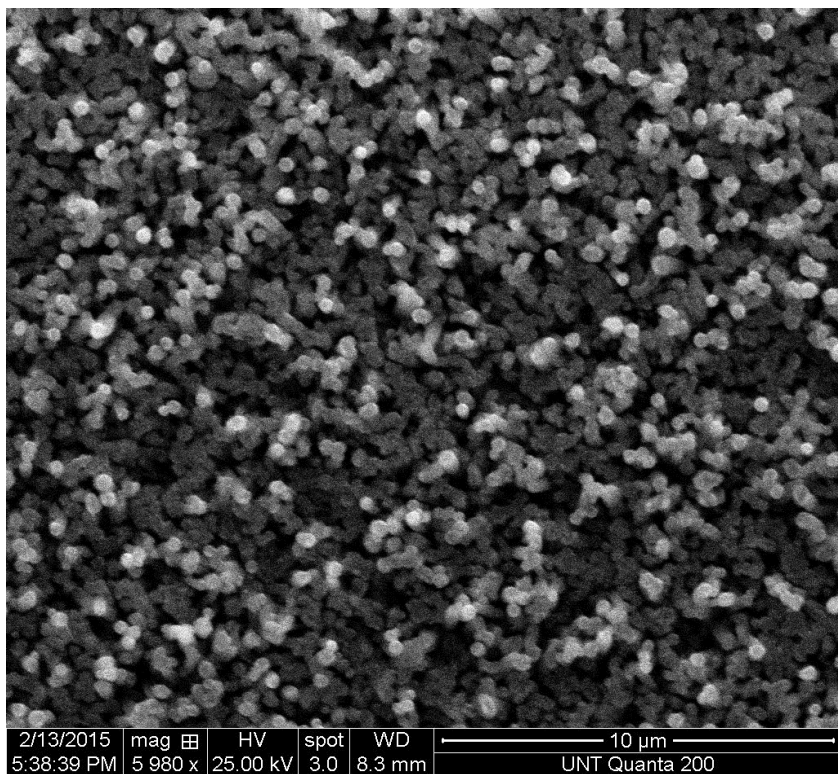

Figure S14. SEM image of Cu<sub>2</sub>O nanorod film before sensitization with N3.

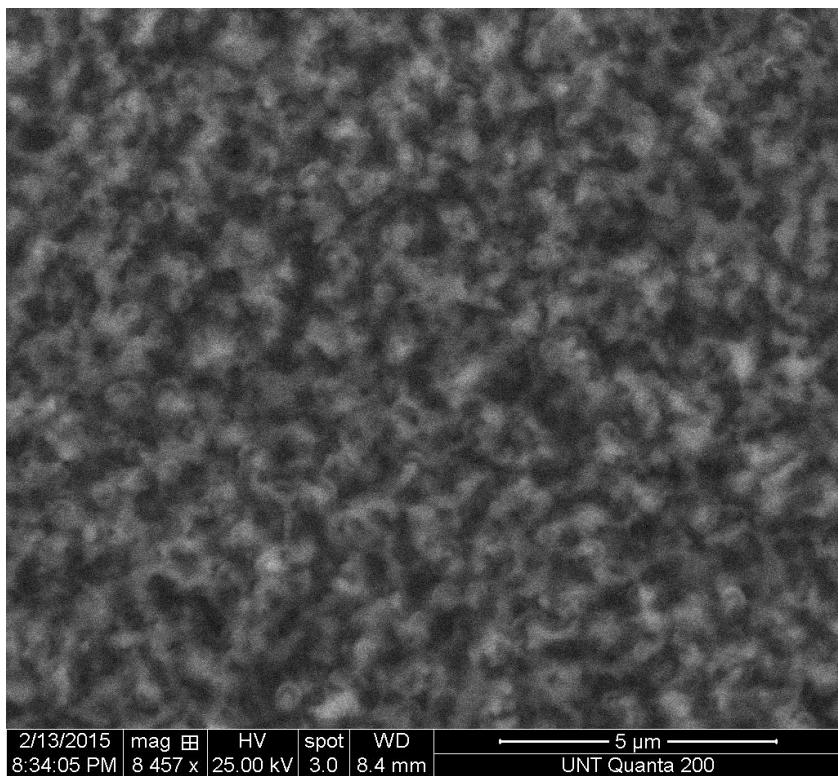

Figure S15. SEM image of Cu<sub>2</sub>O nanorod film after 24 h sensitization with N3.

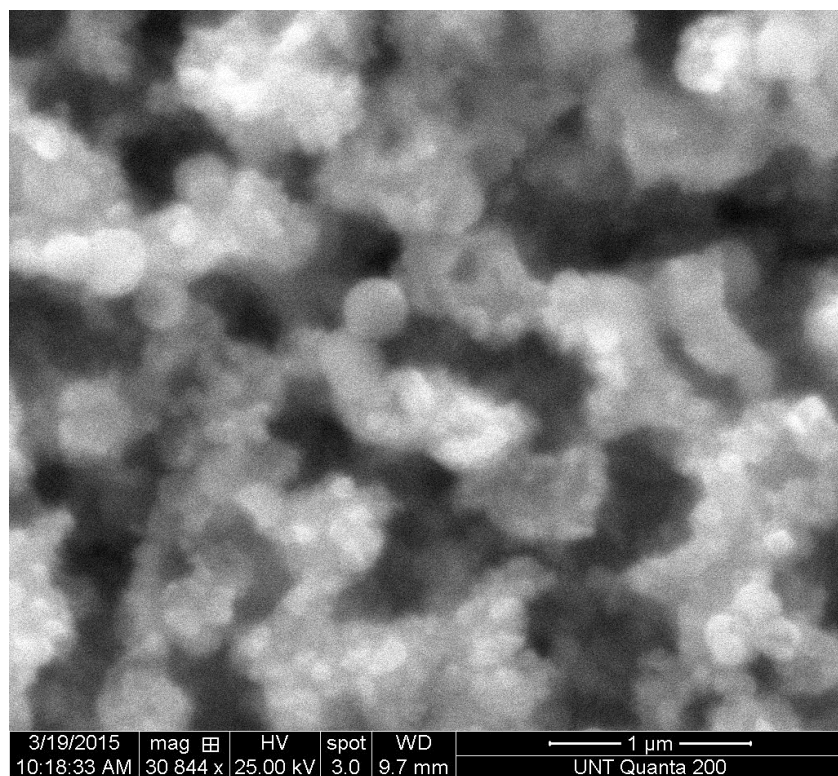

Figure S16. SEM image of Cu<sub>2</sub>O nanorod film after 6 h sensitization with N3.

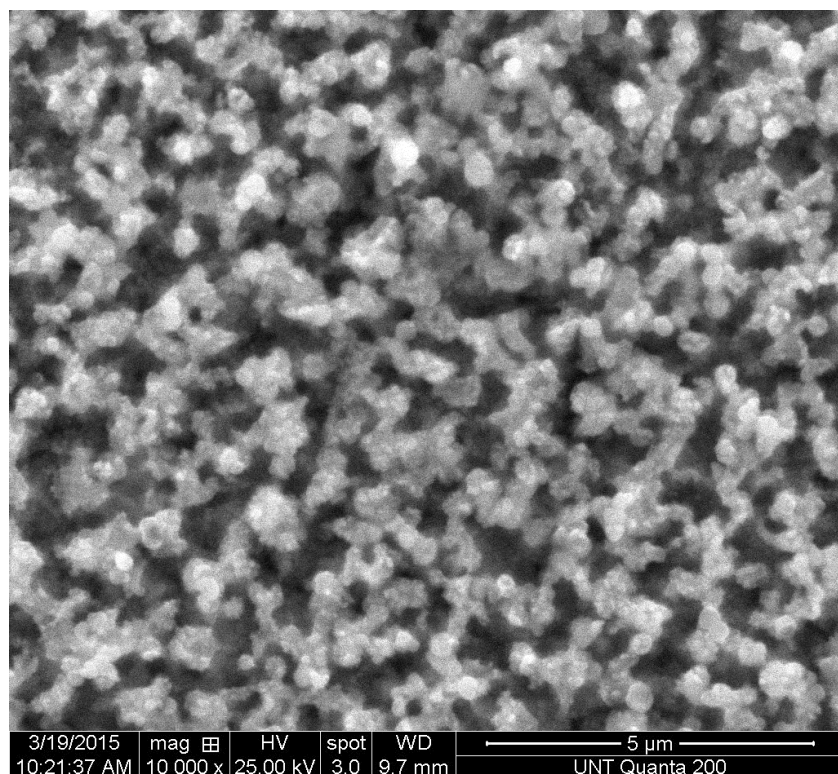

Figure S17. SEM image of Cu<sub>2</sub>O nanorod film after 6 h sensitization with N3.

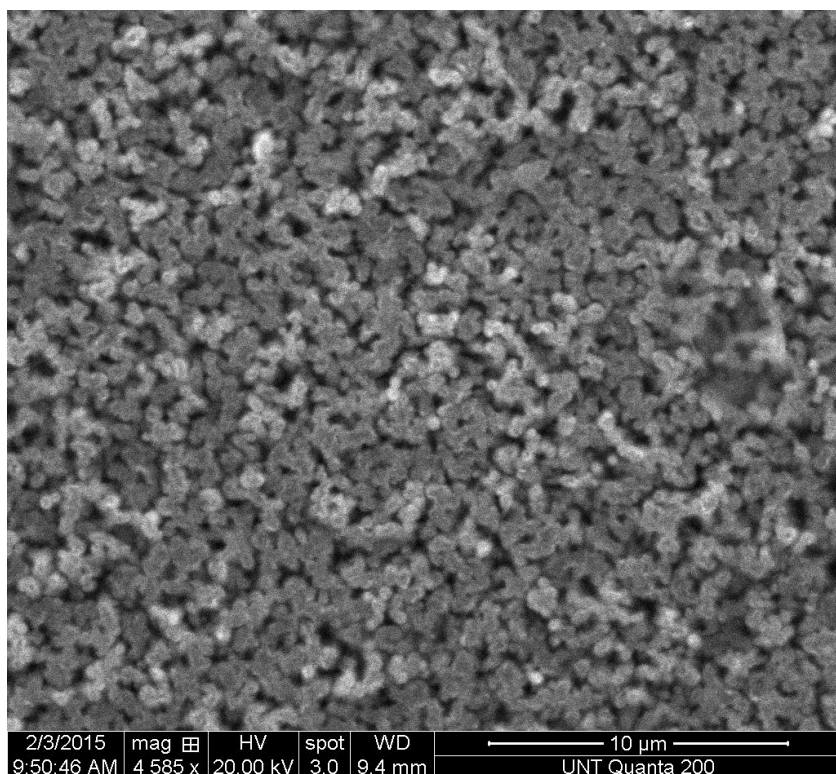

Figure S18. SEM image of  $\text{Cu}_2\text{O}$  nanorod film before sensitization with 1-adamantanecarboxylic acid.

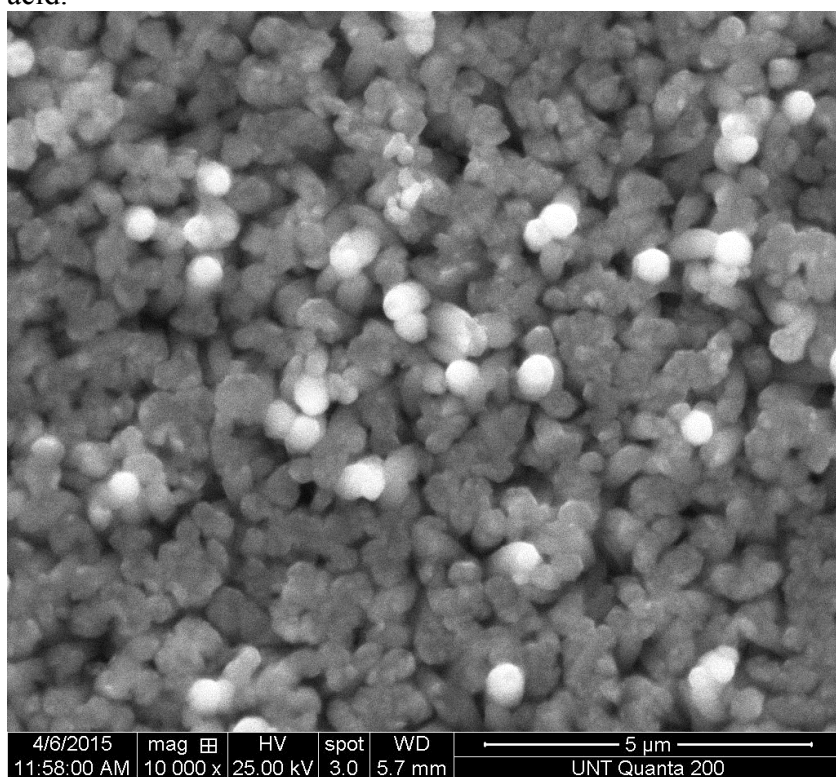

Figure S19. SEM image of  $\text{Cu}_2\text{O}$  nanorod film after 24 h sensitization with 1-adamantanecarboxylic acid.

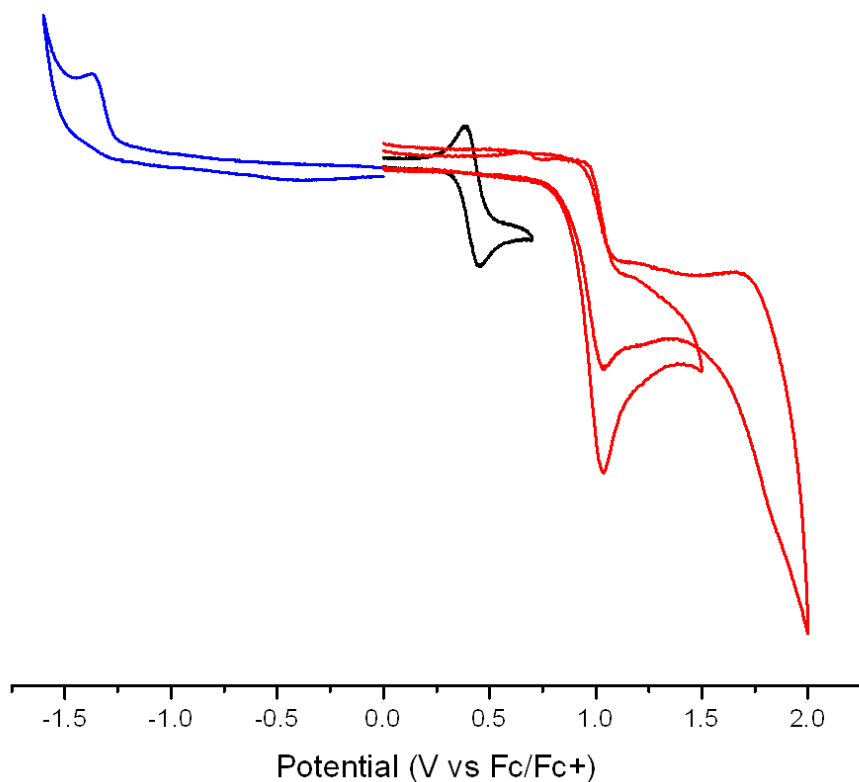

Figure S20. Cyclic voltammogram of Coumarin C343 in acetonitrile containing 0.1 M ( *t*-Bu<sub>4</sub>N)ClO<sub>4</sub> @ scan rate = 50mV/s.

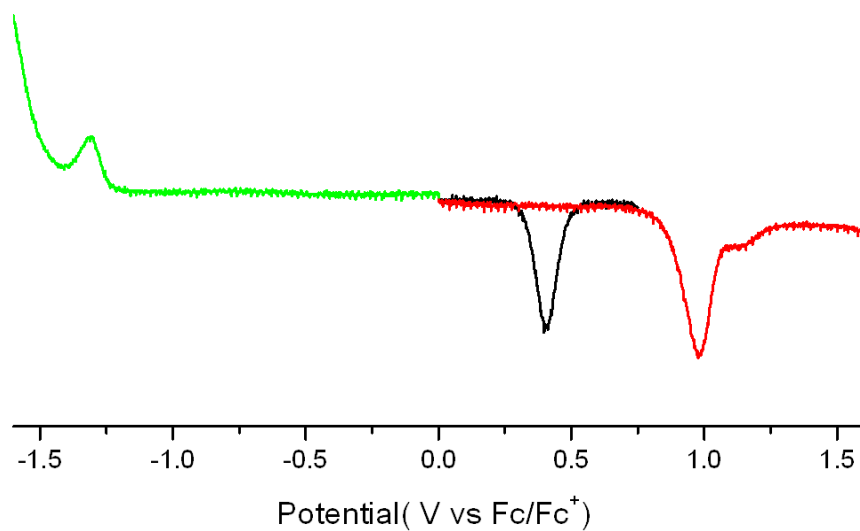

Figure S21. Differential pulse voltammogram of Coumarin C343 in acetonitrile containing 0.1 M ( *t*-Bu<sub>4</sub>N)ClO<sub>4</sub> @ Scan rate = 20mV/s

## References

1. Berhe, S. A.; Gobeze, H. B.; Pokharel, S. D.; Park, E.; Youngblood, W. J., "Solid-State Photogalvanic Dye-Sensitized Solar Cells" *ACS Appl. Mater. Interfaces* **2014**, *6*, 10696–10705.
2. Camps, X.; Hirsch, A., "Efficient cyclopropanation of C60 starting from malonates" *J. Chem. Soc., Perkin Trans.* **1997**, 1595–1596.
3. Lamparth, I.; Hirsch, A., "Water-soluble Malonic Acid Derivatives of C60 with a Defined Three-Dimensional Structure" *J. Chem. Soc., Chem. Commun.* **1994**, 1727–1728.
4. Muthiah, C.; Taniguchi, M.; Kim, H.-J.; Schmidt, I.; Kee, H. L.; Holten, D.; Bocian, D. F.; Lindsey, J. S., "Synthesis and Photophysical Characterization of Porphyrin, Chlorin and Bacteriochlorin Molecules Bearing Tethers for Surface Attachment" *Photochem. Photobiol.* **2007**, *83*, 1513–1528.
5. Haynes, K. H.; Perry, C.; Rivas, M.; Bazan, A.; Golden, T. D.; Quintana, M.; Nesterov, V. N.; Rodríguez, J.; Estrada, W.; Youngblood, W. J., "Templated Electrodeposition and Photocatalytic Activity of Cuprous Oxide Nanorod Arrays" *ACS Appl. Mater. Interfaces* **2015**, *7*, 830–837.
6. Kokotov, M.; Hodes, G., "Reliable chemical bath deposition of ZnO films with controllable morphology from ethanolamine-based solutions using KMnO<sub>4</sub> substrate activation" *J. Mater. Chem.* **2009**, *19*, 3847–3854.
7. Gregg, B. A.; Pichot, F.; Ferrere, S.; Fields, C. L., "Interfacial Recombination Processes in Dye-Sensitized Solar Cells and Methods to Passivate the Interfaces" *J. Phys. Chem. B* **2001**, *105*, 1422–1429.
8. Golden, T. D.; Shumsky, M. G.; Zhou, Y.; VanderWerf, R. A.; Van Leeuwen, R. A.; Switzer, J. A., "Electrochemical Deposition of Copper (I) Oxide Films" *Chem. Mater.* **1996**, *8*, 2499–2504.
9. Papageorgiou, N.; Maier, W. F.; Gratzel, M., "An Iodine/Triiodide Reduction Electrocatalyst for Aqueous and Organic Media" *J. Electrochem. Soc.* **1997**, *144*, 876–884.
